# Supplementary material for: Molecular basis for the role of disulfide-linked αCTs in the activation of insulin-like growth factor 1 receptor and insulin receptor
Source: eLife. 2022 Nov 22;11:e81286. doi: 10.7554/eLife.81286 (PMC9731570; doi:10.7554/eLife.81286)
Supplement: Figure 3—source data 2. [file elife-81286-fig3-data2.xlsx]

## Sheet: Figure 3
3B	min	WT			P673G4			del3C			pY/IGF1R
	0	8.44848	5.32976	2.96669	7.12456	3.54005	2.91797	7.13432	5.2556	5.50151
	1	48.377	40.951	36.3619	29.2432	21.9946	26.1412	31.1503	37.9949	33.2917
	5	94.2936	96.0072	76.4997	52.1848	34.7285	41.6292	49.8929	65.4369	63.9036
	10	100	100	100	61.004	48.0937	39.7822	65.6053	78.7814	65.6882
	30	98.055	140.066	89.922	66.6317	51.9126	40.4819	76.1401	82.6725	82.0871
	60	96.9551	141.072	104.298	60.6444	41.8742	43.7969	75.2851	95.5849	85.0258
	180	83.356	67.2016	125.544	35.5666	28.8876	28.7054	41.1469	71.596	82.0895
	min	WT			P673G4			del3C			pERK/ERK
	0	1.02252	1.12085	1.34995	1.04026	0.803288	1.0626	0.882365	1.60126	2.03834
	1	0.982783	0.974543	1.2632	0.791761	0.867508	1.14049	0.759821	1.12438	1.54974
	5	56.4653	32.2763	37.1298	8.8573	17.1544	11.9565	8.34457	7.97723	16.6709
	10	100	100	100	27.7669	80.3121	57.8117	22.0964	42.9836	54.1882
	30	58.0678	38.8391	40.0527	10.7656	9.75119	10.9915	12.4821	11.8743	17.7712
	60	54.1338	31.5457	29.1748	9.74249	7.94953	8.74301	10.2446	9.22869	12.0461
	180	33.645	22.2111	30.6848	9.77491	5.19328	6.53544	11.683	8.19762	8.70935
3D	WT0	WT5	WT10	WT30	WT60	WT120	WT180	P673G4 0	P6734G 5	P6734G 10	P6734G 30	P6734G 60	P6734G 120	P6734G 180	BMS_0	BMS_5	BMS10	BMS30	BMS60	BMS120	BMS180
	2.54969	1.46824	1.08637	1.31119	1.14988	0.970185	0.624351	1.68785	1.70241	2.36593	1.33458	2.03938	0.904034	2.76319	1.95502	0.97817	2.11085	1.20411	1.19041	2.15588	2.0983
	1.28063	0.756785	1.1486	1.00538	0.507111	0.683295	0.692178	0.939219	1.7619	1.03575	0.987511	2.67617	1.89962	1.82157	3.88649	1.3319	1.93605	1.13389	2.23534	1.64983	2.9876
	2.37877	0.979199	1.73138	0.618481	0.989776	0.504481	0.880147	2.66107	2.1354	1.74727	1.24632	2.76547	1.31192	1.49588	3.4681	2.8983	1.46132	2.38058	2.67889	3.29109	2.8071
	1.90593	1.55215	1.00326	0.76195	0.920195	0.590925	0.681743	2.59801	2.74366	1.01634	2.02301	2.43563	0.59835	0.913761	2.65691	1.81988	1.43309	1.71695	3.039	2.75224	1.48459
	1.59348	1.17219	1.30393	2.14121	0.686428	0.747312	0.232093	1.68153	1.97399	1.15443	1.49242	1.62507	1.34732	1.3411	1.71271	3.0214	1.76413	1.98666	2.75938	2.29714	2.85585
	1.6853	1.24651	1.04214	1.33119	0.585752	0.705547	0.38771	1.26502	2.78498	2.25507	1.27265	0.875056	1.53286	1.72147	1.72729	1.69194	2.0174	2.22735	2.19884	1.74002	1.62705
	1.1164	1.80669	0.733519	0.703411	0.805979	0.673858	0.917629	2.06637	1.63348	1.16168	1.60301	2.39189	1.65846	2.22161	1.0521	2.68454	1.36364	2.34155	2.15321	1.52937	1.52581
	1.55086	2.01452	1.11046	0.800879	0.901499	0.575558	0.531785	1.35839	2.32672	0.983158	2.05445	1.84516	1.61315	2.33707	2.81395	2.75568	1.38551	1.99326	1.68189	1.74242	0.934637
	1.24942	1.54965	1.02241	0.897839	0.462668	0.816163	0.768923	1.44337	1.89531	1.08117	1.01783	1.64658	1.40543	3.4117	1.86595	1.78455	1.88314	1.65428	2.88344	3.17113	1.08596
	1.6886	1.57104	0.935867	1.31741	0.407255	0.794429	0.449727	0.928808	1.69503	1.66332	2.33835	1.7861	1.37369	2.50372	2.34627	2.33381	1.75046	2.07788	2.136	2.53214	1.94892
	1.70345	1.23178	1.15378	0.761609	0.640288	1.05528	0.433383	2.01251	2.11745	1.89394	0.838017	2.38843	1.46693	3.6808	2.03542	1.48047	1.6154	1.90719	0.969924	2.19962	1.60614
	1.48812	0.906314	0.729716	0.479127	0.747457	0.926276	0.795161	2.31308	2.58289	1.28653	1.55041	1.59906	1.56187	1.70734	2.1172	1.34615	1.67247	1.71095	1.59622	1.92342	2.92672
	1.54808	1.3087	0.659839	0.648517	0.772851	0.762834	0.565223	2.41558	1.71771	1.02726	2.20061	3.39502	1.01188	1.81323	2.41271	1.88568	2.57707	1.44512	2.07106	2.65471	2.30182
	1.66794	1.196	0.909621	0.769825	0.733097	0.621656	0.508159	2.48555	2.60538	1.98429	1.37874	0.963096	0.802929	2.3678	3.78809	1.03304	2.31907	2.71177	1.85684	1.4946	2.7962
	2.35179	1.05231	1.00963	0.490183	0.779527	0.727668	0.541863	2.11543	1.51037	1.73215	2.01714	0.858006	1.07078	2.00107	2.73646	2.74357	1.85454	1.5706	1.62265	2.28215	2.48055
	1.98263	1.33623	0.953882	0.604768	1.22749	0.700951	0.415921	2.2702	1.22403	1.44083	1.15238	1.43252	1.22737	1.74888	1.81242	1.76298	1.73585	2.19203	1.83185	1.26457	1.59368
	2.05637	2.04568	1.20899	0.91967	0.873441	0.602665	0.375661	0.907065	2.13678	3.4295	2.01756	1.81844	1.11144	3.59956	2.15791	1.85701	1.48039	2.39629	2.36908	2.45644	0.991135
	1.76842	1.25464	0.989795	0.947864	0.628357	0.720226	0.504672	1.46251	2.13678	1.16341	2.83075	1.72294	0.512604	2.37172	1.7457	1.56986	2.188	2.52496	2.22855	1.57882	1.88476
	1.74707	0.984144	1.17002	0.432923	0.691629	0.919617	0.61791	1.07092	1.18536	1.90661	2.04732	1.38166	0.780483	2.77665	1.27577	1.54994	2.33514	2.05822	2.45992	1.36044	1.25976
	1.39068	1.17384	1.60812	0.381224	0.875464	0.507388	0.618395	1.84598	1.86673	1.55429	2.51438	1.57993	0.7842	3.44227	1.5443	2.00674	1.87606	1.52356	3.09569	1.48321	2.07229
	2.72319	1.1658	1.86446	0.469054	0.6383	1.33312	0.483816	1.02638	2.62459	3.34683	2.40462	1.8387	0.972822	1.55904	1.8158	2.22917	2.05546	2.50833	1.78858	1.80475	1.55306
	2.13445	1.24509	1.37459	0.469054	0.733582	0.658553	0.534634	1.98121	1.67521	1.43676	1.38812	1.03423	1.12827	1.48287	1.25971	2.02939	1.2434	2.14293	2.10247
	1.33846	2.2039	1.45891	0.877899	0.781314	0.624922	0.479611	1.87716	2.27889	1.03082	1.34148	0.586414	1.11266	1.30038	1.03213	1.33177	1.3603	1.52356	2.49961
	1.68207	1.97132	1.45597	0.560089	0.406488	0.53403	1.15134	1.57261	2.45675	1.68167	1.59045	2.13675	1.37532	1.15357	1.07696	2.44177	2.09017		1.98277
	1.98994	1.73827	0.748983	0.710688	0.420472	0.49524	0.375685	1.50211	1.19143	1.77641	1.02524	1.34798	1.9127	1.15964	1.44155	2.50971	3.32917		2.30939
	2.74237	1.636	1.70144	0.795765	0.519439	0.839293	0.768369	1.05492	1.31218	1.74987	0.885813	1.81747	1.19373	2.90549	1.39569	2.47274	2.05338		1.90244
	1.87334	1.3048	1.06888	0.804938	0.546879	0.456029	0.627019	1.72414	2.73729	1.41458	1.42677	1.58549	2.04649	2.24099	2.14231	1.97298	2.13725		2.91266
	1.33922	1.84148	1.09396	0.776972	0.483323	0.926698	0.809995	1.87957	3.03205	1.73703	2.2657	1.54696	0.925682	3.0368	1.45013	1.18092	1.56379		1.67371
	2.18919	1.35405	1.85333	0.839736	0.52901	0.445357	0.395822	1.95066	2.79011	1.37597	2.41825	3.15274	0.984891	2.10611	1.10005	2.60001	1.34157		2.38744
	2.21574	1.0979	1.18608	0.60218	0.561232	0.888197	0.453503	2.49267	2.53712	1.93342	1.31269	2.76562	2.04976	1.3179	1.25809	1.64346	1.75947		2.63503
	2.13817	1.05622	1.86923	0.609809	0.696115	0.471996	0.483735	1.70293	1.08646	2.82974	0.668801	1.02103	1.16319	1.38059	1.4468	2.16763	1.88602		2.02566
	1.73194	1.85618	1.19698	0.756934	0.613801	1.0074	0.576667	2.07304	2.35581	2.56534	0.936622	1.46975	1.70334	2.8891	1.56658	1.76381			2.28572
	1.64271	1.3141	1.13137	0.815093	0.684467	0.451184	0.613198	1.99994	1.60303	2.23053	0.751026	2.64911	2.72781	3.73133		1.44414			1.73763
	3.10706	0.905014	1.33521	1.92242	0.47778	0.702969	0.666879	3.12382	1.03081	2.62795	0.795285	1.66406	1.96491	2.84871
	1.81143	0.812431	1.77219	1.37177	0.677599	0.554431	0.434884	2.69609	3.30197	1.27919	0.538137	2.98269	2.39692	3.27203
	2.91538	0.985721	1.44142	0.697202	0.622016	0.76811	0.617016	2.55137	2.98694	1.56306	2.78542	1.71253	2.877	2.97023
	1.41263	1.11443	2.24653	0.488587	1.33701	0.643215	0.744114	1.81679	2.12148	0.962448	0.769315	2.15745	1.6841	1.7157
	1.83435	1.16168	0.986433	1.04305	0.763562	0.354401	0.995316	1.86128	2.5396	1.31286	1.68426	1.26724	3.04701	1.78291
	3.16045	1.3211	0.782007	0.9777	0.938847	0.652281	0.679591	2.01943	2.97853	1.2391	2.83074	0.813242	1.00301	2.67909
	3.06292	1.70383	0.81309	0.585733	0.810883	0.993448	0.952516	1.62734	1.17366	1.1851	3.39413	0.801606	2.34068	2.01516
	1.76459	2.38672	0.699597	1.0018	0.698915	0.53388	0.720914	1.09752	2.35289	1.37387	2.20262	0.968329	2.13191	1.5739
	1.64312	1.40464	2.15491	0.679212	0.424882	0.917555	0.69751	1.43187	2.21755	1.27183	1.92037	1.03714	1.97891	1.2878
	1.64935	2.73372	1.47046	0.569795	0.482794	0.468165	0.900962	1.81295	1.45261		0.5542	0.793566	3.40311	1.10113
	3.02182	2.39066	1.15649	0.57362	0.643274	0.695312	0.675722	2.87784	0.501436		2.19197	0.771069	1.40656	3.00258
	1.10727	2.60399	1.10251	0.63808	0.773332	0.428011	1.13943	2.9757			1.34483	1.49447	1.08673	1.21826
	1.55213	1.63757	2.13878	0.984496	0.774331	0.828793	0.801462	2.87643			0.748316	1.35723	3.13688
	1.42038	1.95118	1.82947	1.13604	1.00875	0.550867	0.587662	2.05779				1.89524	3.04402
	1.38286	1.60527	2.64126	1.01449	1.01067	0.571604	0.69594	2.40552				1.42902
	1.71153	1.35672	3.83	0.968097	0.987649	0.790863	0.589522	3.23586
	1.08749	2.89697	2.96898	1.02919	1.00592	0.513628	0.578712	3.73696
	1.3727	1.8224	2.52207	1.69819	0.917293	0.665274	0.722474
	1.01679	1.71374	1.34104	1.05054	0.610733	0.917299	0.559505
	1.408	1.0865	1.21742	1.18277	0.927173	0.962243	0.562565
	2.19273	0.935671	1.75	1.02211	1.16835	0.712446	0.693044
	2.68682	2.05551	0.953379	1.32685	1.99995	0.832509	0.903234
	1.9944	1.4252	0.807348	1.02714	0.877606	0.715482	0.508317
	1.53313	1.20042	1.4177	0.838064	0.741809	0.684845	0.567748
	1.65704	1.83096	1.46762	1.25156	0.792044	0.830477	0.666901
	1.52631	1.81875	1.067	1.4519	1.02611	0.927375	0.538319
	2.07532	2.20578	1.10408	1.04006	0.916479	1.3537	1.14784
	2.74154	2.12845	1.0488	1.53312	1.10409	0.769689	0.531459
	2.0515	1.88061	1.06329	2.1195	0.741809	0.965143	0.649863
	1.87715	1.40776		1.67283	0.792044	0.442355	1.06597
	3.33365	2.22449		1.15847	1.02611	0.781449	0.943736
	2.93404	2.01437		2.24735	0.916479	0.661043	0.895862
	2.47529	1.2662		0.950888	1.10409	0.674413	0.572932
	3.26508	2.13842		0.935502	0.741809	0.624598	0.873781
	3.15976	1.32498		1.12681	0.792044	0.511834
	2.04926	0.94177		0.935502	1.02611	0.800204
	3.07816	1.27997		1.05054	0.916479
	1.20727	1.25961		1.69819	1.10409
	1.34243	1.25291
		1.70623
		1.389
		1.5258
		1.05571
		2.54921
		1.89805
		1.44222
		1.68202
		1.73646
		1.78559
		1.50473
		1.14683
		1.52903
		1.22662
		1.24343
		1.67184
		1.74296
		1.69338
		1.33026
		1.46272
		1.94638
		1.37739
		1.49158
		1.33264
		2.45093
		1.84146
		1.86795
		1.36084
		1.69181
		2.47007
		1.93929
		2.09915
		2.94164
		2.29858
		1.45268
		1.4555
		1.26607
		2.67671
		1.84034
		1.42169
		1.7676
		1.72305
		3.26845
		2.04653
		1.57933
		1.59531
