# Supplementary material for: Molecular basis for the role of disulfide-linked αCTs in the activation of insulin-like growth factor 1 receptor and insulin receptor
Source: eLife. 2022 Nov 22;11:e81286. doi: 10.7554/eLife.81286 (PMC9731570; doi:10.7554/eLife.81286)
Supplement: Figure 5—source data 1. [file elife-81286-fig5-data1.xlsx]

## Sheet: Figure 5
5C
			WT															3CS															del686-690
	0	0	100	100	100	100	100	100	100	100	100	100	100	100	100	100	100	100	100	100	100	100	100	100	100	100	100	100	100				100	100	100	100	100	100	100	100	100	100	100	100
	0.01	0.01	94.4444	96.732	85.7143	100.87	95.5752	114.563	124.528	101.786	122.549	96.1039	91.954	76.7442	105.217	103.252	91.0569	115.054	87.5	111.111	88.3495	93	118.28	98.4127	94.9153	92.4242	81.25	94.3925	82.1138				130.12	114.607	112.766	110.976	123.377	104.545	96.1539	95.2381	96.8254	91.1765	91.2621	102
	0.03	0.03	97.2222	90.8497	87.5776	106.957	95.5752	131.068	126.415	136.607	130.392	111.688	90.8046	84.8837	101.739	103.252	97.561	93.5484	82.6923	100	91.2621	77	87.0968	96.8254	93.2203	81.8182	96.4286	92.5234	84.5528				122.892	121.348	95.7447	119.512	115.584	95.4545	96.1539	93.6508	85.7143	88.2353	82.5243	94
	0.1	0.1	95.8333	92.1569	83.2298	92.1739	91.1504	111.65	110.377	108.036	113.725	87.013	87.3563	84.8837	100.87	102.439	104.878	117.204	97.1154	102.02	90.2913	82	95.6989	84.127	96.6102	98.4848	93.75	87.8505	78.8618				130.12	93.2584	103.191	100	110.39	120.455	105.769	92.0635	98.4127	94.1176	83.4951	81
	0.3	0.3	89.5833	91.5033	82.6087	98.2609	100.885	119.417	111.321	99.1071	101.961	97.4026	78.1609	83.7209	103.478	103.252	105.691	93.5484	88.4615	92.9293	83.4951	88	88.172	84.127	94.9153	75.7576	85.7143	100	83.7398				102.41	96.6292	105.319	89.0244	100	100	105.769	85.7143	87.3016	89.2157	88.3495	90
	1	1	80.5556	75.817	72.6708	73.0435	78.7611	91.2621	89.6226	88.3929	102.941	77.9221	71.2644	68.6047	88.6957	77.2358	88.6179	82.7957	64.4231	93.9394	69.9029	66	86.0215	71.4286	89.8305	59.0909	78.5714	75.7009	69.9187				84.3374	83.1461	77.6596	76.8293	85.7143	85.2273	88.4615	68.254	77.7778	74.5098	70.8738	77
	3	3	65.9722	67.9739	62.1118	64.3478	75.2212	82.5243	85.8491	76.7857	89.2157	55.8442	57.4713	62.7907	69.5652	68.2927	67.4797	64.5161	50.9615	63.6364	57.2816	59	55.914	60.3175	66.1017	59.0909	65.1786	60.7477	45.5285				73.494	66.2921	68.0851	60.9756	71.4286	76.1364	67.3077	57.1429	65.0794	60.7843	57.2816	68
	5	5	59.0278	49.6732	56.5217	53.913	44.2478	67.9612	63.2075	55.3571	63.7255	51.9481	43.6782	50	55.6522	52.8455	57.7236							49.2064	50.8475	60.6061	63.3929	56.0748	41.4634				69.8795	59.5506	67.0213	63.4146	51.9481	53.4091	61.5385	50.7937	49.2063	33.3333	47.5728	43
	10	10	45.8333	45.098	39.7516	38.2609	36.2832	45.6311	52.8302	39.2857	44.1176	48.0519	41.3793	40.6977	42.6087	47.9675	51.2195	33.3333	50	52.5253	43.6893	30	38.7097	47.6191	37.2881	54.5455	35.7143	49.5327	47.9675				38.5542	31.4607	38.2979	46.3415	44.1558	39.7727	42.3077	36.5079	30.1587	39.2157	40.7767	36
	30	30	38.8889	35.2941	37.8882	28.6957	26.5487	38.835	30.1887	33.9286	27.451	24.6753	28.7356	34.8837	30.4348	26.0163	32.5203	47.3118	37.5	37.3737	27.1845	37	37.6344	25.3968	44.0678	39.3939	37.5	31.7757	22.7642				45.7831	42.6966	28.7234	36.5854	41.5584	32.9545	30.7692	22.2222	25.3968	26.4706	19.4175	25
	100	100	27.0833	28.7582	18.0124	22.6087	15.9292	40.7767	28.3019	28.5714	37.2549	22.0779	29.8851	31.3953	16.5217	21.1382	16.2602	18.2796	23.0769	37.3737	13.5922	25	27.957	25.3968	20.339	30.303	26.7857	33.6449	41.4634				26.506	30.3371	25.5319	20.7317	24.6753	15.9091	34.6154	19.0476	28.5714	15.6863	27.1845	18
	300	300	19.4444	19.6078	17.3913	2.6087	2.65487	10.6796	4.71698	8.92857	0	16.8831	21.8391	13.9535	13.913	11.3821	12.1951	23.6559	16.3462	33.3333	12.6214	11	15.0538	31.746	23.7288	27.2727	20.5357	17.757	11.3821				25.3012	24.7191	18.0851	9.7561	15.5844	29.5455	23.0769	25.3968	20.6349	16.6667	15.534	19
	1000	1000	20.8333	20.2614	21.7391							25.974	20.6897	31.3953	12.1739	10.5691	11.3821	25.8065	13.4615	25.2525	15.534	18	27.957	14.2857	20.339	19.697	25	17.757	17.0732				33.7349	24.7191	37.234	24.3902	27.2727	22.7273	23.0769	22.2222	30.1587	17.6471	18.4466	19
5D				WT																																				3CS
		0.1	0.1	3.50404	8.3558	1.00251	1.75439	3.74332	4.81283	2.94985	1.76991	0.810811	4.05405	4.10959	3.56164													1.8	0.6	3	2.4	3	4.9	3.8	4.2	3.7	3.9	4.1	2.9	10.3889	6.75275	3.38093	4.10542	8.24441	5.4104	7.39018	5.11628	4.94804	3.90635
		1	1	13.4771	11.8598	12.782	9.77444	11.2299	12.8342	11.2094	12.0944	14.5946	13.5135	10.6849	10.411	16.763	19.0751	17.6301	17.4807	19.0231	12.5964	17.1355	19.6931	14.0665	16.7139	21.5297	20.1133	11.9	15.5	11.4	15.8	16.1	16.9	13.4	15.4	13.1	15.1	16	16.6	26.4916	21.8166	25.84	21.2516	25.5062	24.4756	25.5814	19.3282	26.5632	21.6151
		10	10	49.5957	52.2911	48.8722	48.6216	55.8824	53.2086	58.4071	60.472	60.8108	51.8919	49.863	48.4932	67.1965	68.3526	62.2832	62.2108	57.8406	56.2982	60.9974	57.9284	56.1381	67.5637	68.1303	71.813	48.5	55.1	53.4	52.2	57.5	60.3	53.5	58.3	53	60.3	51.4	57.6	73.2414	67.2678	64.9622	61.0983	71.1081	59.2567	77.8811	73.0491	74.2206	67.9705
		30	30	71.6981	63.8814	64.411	57.6441	75.1337	60.9626	83.1858	64.8968	72.7027	62.1622	71.2329	60	87.1387	92.052	97.8324	79.9486	83.0334	85.347	79.156	80.179	79.156	90.2266	91.3598	90.5099	76.9	98.4	73.8	93.4	85.6	98.9	79.2	95	78.9	104.7	80.7	100.2	82.3316	69.865	74.8635	61.5813	78.0643	68.7893	91.5245	75.323	77.6061	67.1892
		100	100	100	89.2183	100	81.203	100	88.7701	100	96.7552	100	81.0811	100	85.7534	100	97.3988	98.8439	100	89.2031	90.4884	100	90.5371	94.3734	100	99.4334	101.983	100	102.2	100	110.2	100	112.3	100	107.6	100	116.2	100	113.5	111.68	86.4872	105.775	83.3158	111.042	85.0205	117.106	90.3876	107.034	75.5227
[truncated: 50 more columns]
