# Supplementary material for: Molecular basis for the role of disulfide-linked αCTs in the activation of insulin-like growth factor 1 receptor and insulin receptor
Source: eLife. 2022 Nov 22;11:e81286. doi: 10.7554/eLife.81286 (PMC9731570; doi:10.7554/eLife.81286)
Supplement: Figure 6—figure supplement 1—source data 2. [file elife-81286-fig6-figsupp1-data2.xlsx]

## Sheet: Figure S6
6B
				IR-Myc (Myc)					pY1150/1151 IR
					250
					150
					100
					75
6C
		Insulin	WT				L1 (del170-181)
		0	31.1264	35.6981	27.5274	38.0864	28.6026	42.182	26.8295	30.7636
		10	100	100	100	100	104.873	93.2408	107.988	98.8981
