# Supplementary material for: Molecular basis for the role of disulfide-linked αCTs in the activation of insulin-like growth factor 1 receptor and insulin receptor
Source: eLife. 2022 Nov 22;11:e81286. doi: 10.7554/eLife.81286 (PMC9731570; doi:10.7554/eLife.81286)
Supplement: Figure 6—source data 2. [file elife-81286-fig6-data2.xlsx]

## Sheet: Figure 6
6B
		pY/IR	min	WT													3CS													del686-690
			0							8.77458	39.809	32.9063	16.0111	31.7247	20.1548	13.8648	39.7293	33.4866	33.6303	18.006	43.7334	25.3488	17.255	50.8544	49.5643	28.1046	62.7301	52.8376	45.0574	22.1971	19.4383	13.4919	22.4396	25.7398	12.6851	50.3318		47.1215
			1							23.161	65.4924	68.0668	56.5353	53.8937	46.1187	43.198	86.1367	69.0619	66.4097	46.7569	75.79	79.496	42.3124	85.6282	88.2292	65.0246	81.6601	83.2406	59.8018	44.71	27.4447	29.3815	33.3397	37.6032	16.2275	37.3764		43.691
			5							59.7734	157.554	120.749	95.9458	96.8596	82.6077	60.8294	126.549	109.802	117.801	81.4267	112.171	117.471	77.1842	145.434	148.844	107.638	133.517	126.171	92.7873	82.8018	36.0969	28.2688	38.6498	35.4651	17.5126	57.3799	46.8414	52.1821
			10	100	100	100	100	100	100	100	100	100	100	100	100	100	140.981	115.01	123.187	88.4073	130.444	140.165	87.7542	134.678	136.855	136.656	153.093	124.657	111.72	75.3906	37.9065	42.9564	45.2884	43.8821	20.8652	70.6551	48.2044	51.105
			30							87.1019	144.333	112.291	104.321	121.27	93.8423	74.9317	159.143	142.414	126.251	85.272	139.165	133.684	91.0137	171.642	184.588	129.964	165.121	143.74	132.389	71.4708	36.8929	56.6778	43.0968	45.2108	19.6872	66.2227	54.8804	53.446
			60							51.6274	140.705	119.885	68.8779	130.04	116.695	77.7943	149.831	136.058	131.47	83.8044	143.816	155.401	96.1316	187.257	178.496	85.7571	156.976	152.733	135.204	61.8099	36.2793	65.6624	51.371	37.8947	19.4486	59.4663	65.1331	63.3167
			180							34.1055	91.886	86.8639	56.8083	112.359	73.3901	66.89	133.22	105.89	117.944	54.181	133.92	151.348	68.6768	137.215	156.649	46.1817	159.003	167.227	143.88	51.075	36.2793	56.6254	53.0397	37.0853	17.4171	49.9659	50.4476	37.5918
		pAKT/AKT		WT							3CS							del5:WT
			0			47.8205	48.91	59.408	51.9935	64.6217	65.0595	49.4555	49.4673	41.6486	56.1951	61.7102	47.8113	56.7913	48.7204	44.2944	54.2556	60.4817	46.0579
			1			49.8914	53.3611	90.2778	81.3001	81.1224	57.0791	47.8122	42.2807	43.8694	70.2655	75.1219	64.6248	67.191	50.7217	52.8336	69.1458	87.1918	59.5038
			5			82.0519	79.6243	98.9879	141.811	104.557	82.1438	58.7276	69.9878	57.1351	90.3696	109.474	86.1834	85.803	63.8929	65.9574	91.431	109.349	83.0178
			10	100	100	100	100	100	100	100	80.6578	70.0753	73.2806	66.6667	88.9835	112.297	79.4598	94.3273	71.3959	78.8063	103.971	95.7265	76.692
			30			106.371	105.964	100.234	143.827	111.827	90.187	77.9062	94.3102	72.3404	97.7719	107.929	86.6418	98.637	77.0533	88.554	111.309	104.035	89.6007
			60			90.62	105.532	111.823	133.888	96.8521	94.0487	83.4604	100.546	83.7107	103.175	112.05	82.357	95.6276	87.762	99.669	108.949	98.5385	80.1289
			180			81.3841	76.4269	91.8207	108.02	75.6548	89.7618	73.0901	94.1974	77.46	84.3724	111.406	72.0232	90.8238	72.4224	79.3473	107.153	87.6329	84.6899
		pERK/ERK		WT												3CS												del686-690
			0						3.36173	5.01207	6.91896	9.16447	13.5449	25.0405	12.4229	1.36439	1.48299	7.5059	7.68424	1.98565	3.95433	12.1331	7.79027	12.3005	9.49561	18.6717	23.1562	0.791476	1.68818	6.13941	5.02304	3.30117	5.1297	10.0805	17.8805	22.5281
			1						5.07876	10.2877	8.36084	8.33195	13.6273	32.6392	20.7509	1.00521	1.03927	2.14991	2.59766	1.31923	3.50131	14.2411	6.41101	7.92232	8.84492	16.7339	25.735	2.62263	0.78611	3.06694	3.14341	2.15632	3.25124	16.6711	28.5619	30.7077
			5						62.3825	204.549	104.513	165.111	99.7486	100.919	80.7018	50.1615	18.9023	68.8625	75.6274	16.3441	31.2522	122.659	81.4463	135.471	39.8817	35.4293	91.3957	33.0047	6.63578	42.8147	33.9465	18.0543	13.0536	35.5533	29.0158	43.6036
			10	100	100	100	100	100	100	100	100	100	100	100	100	74.2691	34.5163	62.9174	71.299	47.1694	60.8012	52.6357	73.7742	76.8421	54.8649	68.0764	143.858	88.9777	17.2668	26.5261	26.1281	53.17	31.0791	37.0304	44.9028	40.603
			30						29.6575	45.7787	31.9402	65.3228	75.4299	64.9104	82.9552	22.2802	10.5543	27.9034	34.4168	13.535	20.5385	37.1135	29.3216	38.8098	40.5386	63.3688	108.059	9.04006	2.5842	8.03103	7.32623	7.74166	10.7657	32.0527	19.5221	33.3989
			60						21.9607	42.392	34.0934	39.0594	80.9125	47.294	91.0973	19.5665	13.8252	30.0137	39.708	16.3965	24.7352	31.7848	25.7224	25.0057	39.673	60.2067	104.762	10.2171	2.71117	13.5983	13.6641	8.08036	10.0028	34.3854	21.8971	17.5587
			180						19.5219	22.4603	20.177	42.3945	48.2718	75.2584	89.9507	12.8452	6.88947	35.8177	47.4612	8.87393	14.5655	30.9087	23.496	24.3606	33.2445	50.5564	154.649	16.4151	1.68694	16.3825	17.2902	5.82271	4.99371	25.9981	33.1862	18.346
6D	WT0	WT5	WT10	WT30	WT60	3CS0	3CS5	3CS10	3CS30	3CS60	del686-690 0	del686-690 5	del686-690 10	del686-690 30	del686-690 60
	0.584348	1.05078	0.432175	0.5363	0.366093	1.94378	0.898015	1.00247	0.490792	0.957426	0.921663	2.83256	1.87902	2.06446	2.30694
	1.0909	0.726872	0.841188	0.551112	0.244486	1.96263	0.517384	0.628201	0.63529	0.976042	0.890389	1.76845	1.93711	1.26026	2.76606
	1.23783	0.728678	0.780843	0.508238	0.675787	1.42758	0.635834	0.82548	0.852432	1.20248	1.20028	2.54013	2.24454	1.02919	2.24468
	0.828122	0.70756	1.32204	0.830021	0.359079	1.3008	0.964264	1.02008	0.662062	1.07103	2.311	1.46855	1.99622	0.948117	1.26048
	0.862081	1.45684	1.14656	0.739634	0.288396	1.27269	1.38879	1.0886	0.70063	1.27654	0.951363	1.64258	1.74983	1.12272	0.73909
	2.03684	1.05026	1.23499	0.58966	0.42787	1.46686	1.42599	0.928643	0.520464	1.25993	2.57776	4.38767	1.98787	1.44755	2.3934
	1.34659	1.28252	1.26315	1.72188	0.402366	2.04835	2.08101	1.09943	0.498474	1.14182	1.97925	3.49149	1.01747	1.25941	0.986823
	2.23469	1.14905	1.47812	0.603241	0.276979	1.99048	1.78242	0.922195	0.658328	0.802368	2.23856	2.08175	1.06066	2.46486	1.66939
	2.24863	2.08051	0.784513	1.31731	0.515942	2.20913	2.26065	0.692967	0.753344	1.16159	1.06561	1.46112	1.23885	1.15702	1.12783
	1.95628	1.95531	0.7714	0.609022	0.510666	1.53414	2.04398	0.887901	0.754094	0.964845	2.43666	2.01142	1.4338	1.39005	0.991403
	3.55428	1.25761	0.287605	0.421505	0.277515	1.52642	2.5527	1.0231	1.16078	1.01675	2.12124	2.42261	0.915689	0.863973	0.743768
	4.08687	0.829364	0.572614	0.308033	0.501423	1.25723	2.74271	0.717501	0.679342	0.905748	2.3432	1.45323	1.12844	1.15426	1.53262
	2.21727	1.77244	0.728346	0.497736	0.339328	2.95222	1.27411	1.16905	0.586385	0.906046	2.52319	1.25432	0.920253	1.41114	0.794025
	1.22239	0.98629	0.912725	0.523789	0.319974	1.52784	1.70253	1.05899	0.828402	0.981025	1.54599	1.5137	1.64475	1.15747	1.86346
	1.16885	0.952963	0.617271	0.601129	0.458938	2.16823	1.35273	0.867915	1.09449	0.591865	2.12201	2.00057	1.33185	1.85968	2.00265
	1.23113	1.0134	0.553921	1.34282	0.520665	1.64971	1.19033	1.581	0.601185	0.681235	1.03086	2.77167	1.02474	1.69825	1.74226
	1.05674	0.802186	0.919922	1.45408	0.458	1.27019	1.39948	1.79867	0.995191	0.757098	1.51704	2.42197	1.55194	1.70353	1.29648
	1.48731	0.677914	0.874112	0.611814	0.428784	2.52737	1.72959	0.592468	1.13693	0.859362	2.36848	2.09766	1.07377	0.831803	2.56653
	1.19162	0.672356	1.01606	0.685595	0.318457	2.20396	1.17069	0.594235	1.41255	1.30215	2.54139	1.93517	1.10681	1.29475	1.4304
	2.41204	1.04887	0.487133	0.359073	0.334354	1.14765	1.2663	1.05491	0.799818	1.37537	1.831	1.65446	1.28288	0.9957	1.63555
	3.14047	1.3471	0.82131	0.415889	0.200625	1.63877	1.49104	1.21052	0.538145	0.884086	3.30287	2.57544	0.913614	1.06925	1.52835
	4.50758	1.57669	1.34678	0.39087	0.316226	1.38785	2.46073	1.38484	0.543884	1.20237	1.97989	2.46293	0.863498	5.15514	1.46039
	2.57946	0.546349	0.859496	0.223664	0.621984	1.72715	2.59769	1.29389	0.654773	0.633966	1.77355	1.50997	1.02384	2.73902	1.8229
	1.7158	0.487738	1.0246	0.291488	0.320524	2.3273	2.42188	1.76084	0.578425	1.08761	2.03122	1.82462	2.26863	1.90205	1.49559
	2.4206	0.905559	0.579	0.321246	0.351262	1.92262	2.27571	1.25796	0.938676	0.98389	1.4741	1.58996	2.02674	2.06958	1.1435
	3.5515	0.921996	0.887212	0.335904	0.65166	2.24144	1.85041	1.19462	0.53716	0.628548	1.5433	1.70981	1.74883	1.29339	0.867545
	1.8623	0.644456	0.935477	0.300039	0.567597	1.48374	1.92812	1.74708	0.762518	0.619673	1.56315	1.86414	1.22395	2.49983	0.909302
	2.8377	0.887517	1.38551	0.589175	0.542888	1.45448	2.3452	1.51559	1.09121	0.773545	2.29857	2.47534	0.913614	1.0417	0.941883
	1.78775	0.80272	1.33485	0.638132	0.231551	1.16391	0.740747	1.86338	1.07995	0.782121	2.00223	1.19312	1.63116	1.15212	1.5478
	0.984185	1.17833	1.26668	0.641194	0.210414	1.66985	0.575128	1.26166	0.995007	1.06902	2.06605	1.37374	1.35814	1.18662	1.46062
	2.18178	0.874787	0.450404	0.481473	0.32889	1.78453	2.62102	1.04713	0.566542	0.858044	1.40206	3.70708	2.12129	1.94382	1.823
	1.57785	1.01889	1.37523	0.470219	0.481009	1.62548	2.39281	0.971259	0.40568	1.00487	1.69072	1.62267	4.07848	0.995881	2.28817
	2.72314	0.687445	1.67231	0.343118	0.303892	1.39469	2.55774	1.58145	0.319214	1.16558	2.72562	2.29752	1.54719	1.33856	0.847701
	1.59553	0.617845	0.728067	0.402441	0.298494	1.1872	1.83612	1.48977	0.80576	0.975308	1.85089	1.04547	2.2442	3.03286	1.00674
	1.13487	1.45986	0.816536	0.617892	0.447855	1.44186	2.32725	1.031	0.486624	0.854134	1.2381	2.59783	1.97066	3.67387	0.809555
	1.77816	0.611544	1.22719	0.501532	0.609736	1.60459	1.05217	1.16597	0.522315	0.640624	1.21131	2.25539	1.01509	0.686419	0.704077
	1.46524	0.61263	0.717136	0.598754	0.338726	2.09834	0.700737	0.69265	0.807995	1.00735	1.45023	2.70135	2.38688	1.32798	1.45992
	1.04518	0.674736	0.815809	0.438013	0.31702	1.14672	1.75402	1.20037	0.937442	0.800059	0.837232	1.31188	1.01492	1.5015	1.2974
	2.04403	0.747642	1.50815	0.493301	0.248268	1.4072	1.33317	2.01054	1.41659	1.20601	1.67594	1.08843	2.6979	1.34849	2.24178
	1.37738	0.645726	0.697845	0.929089	0.339262	2.11925	1.91966	0.977952	0.87163	1.01837	1.65168	1.36947	2.78744	1.94201	2.24313
	1.34462	0.597807	0.851513	0.794276	0.433041	1.93549	1.47982	1.14389	1.12713	0.918671	1.93511	1.69872	3.17837	1.57484	3.55855
	0.823702	0.569671	0.588523	0.713644	0.316727	1.47224	2.56405	1.45547	1.04642	0.674687	2.21348	1.74465	1.75291	1.82384	2.45014
	2.73842	0.691079	0.350786	0.578395	0.368818	2.7237	1.63144	1.22629	0.799906	0.971651	1.26821	1.38065	0.940164	1.64972	2.67841
	1.32735	0.711801	0.36142	1.04412	0.400135	1.97099	1.54232	1.16561	0.795404	0.773656	2.10054	1.53326	1.40384	1.54367	1.26171
	1.11606	0.598714	0.93893	0.799338	0.279201	1.50423	1.8596	0.865109	0.725297	0.501876	1.24388	1.60582	1.81454	1.3916	1.74559
	2.19127	0.671117	0.578533	0.782826	0.596059	1.58558	1.51117	0.743241	1.06408	0.764433	1.67969	1.03859	0.881676	1.01795	2.82011
	1.91794	1.36134	1.01571	0.856087	0.414493	0.871329	1.16452	1.09084	1.00144	0.966865	1.73727	1.33264	0.831975	1.58368	0.970796
	1.66875	1.44644	0.882758	0.819564	0.897465	2.05639	1.26162	1.00369	0.856836	0.807186	2.47655	2.19798	1.10588	2.07281	1.27104
	1.72943	1.77735	0.780061	0.844775	0.664831	3.48094	1.24913	0.590889	0.689499	0.694927	2.43899	2.15792	0.937446	0.916519	1.48358
	3.80364	1.13594	0.633926	0.91918	0.588395	2.08868	1.22278	0.716402	0.769826	0.793464	1.72886	0.962659	1.56854	1.97842	0.937966
	2.30882	1.43181	0.801547	1.02212	0.719995	0.971972	1.74903	0.969561	0.857556	0.82318	1.95396	1.80956	0.754724	1.61946	1.32661
	0.933222	1.06442	0.670331	0.47944	0.632477	2.08934	1.02922	1.25992	0.59138	0.816323	1.45642	1.29668	1.71983	2.88539	0.812437
	1.59042	1.48435	0.87461	0.598234	0.813951	0.912852	2.25288	0.903615	0.872194	0.89532	1.21153	1.29916	1.54712	1.83855	1.55117
	1.55255	1.25859	0.884714	0.729385	0.370628	1.24201	2.0144	1.98468	1.09561	0.655082	2.15739	2.00506	2.29409	0.904205	2.18346
	1.17195	2.08166	0.830894	0.732973	0.346259	1.00892	2.53116	0.573398	0.992337	0.89899	1.58821	1.57642	1.11505	0.969741	3.32401
	1.55266	1.45637	1.09913	0.734609	0.539208	1.21178	0.893777	1.13954	0.530998	0.540237	2.54709	0.893507	2.02504	1.40217	1.79491
	1.70314	2.60986	0.906903	0.473322	0.569342	1.06109	1.14362	1.08168	1.25741	0.830037	1.44179	2.41354	1.80794	1.05096	2.66822
	2.15186	1.8305	0.565885	0.593991	0.478925	0.816447	0.773532	0.998348	1.20625	1.58286	1.27419	2.28704	2.96887	0.941588	1.5812
	1.70511	1.91149	0.634746	0.316505	0.52747	1.55492	0.898232	0.801872	1.05719	0.696684	0.897682	2.5855	1.19804	1.13869	1.14179
	1.3699	0.689566	0.897084	0.592026	0.417843	2.60227	1.54389	1.41002	1.30006	1.1695	1.48763	1.35236	1.30413	1.61431	0.822797
	1.10894	1.10006	0.352573	0.528321	0.51395	1.40021	1.64596	1.99367	0.6778	0.671945	1.85914	0.876857	1.22132	1.95084	0.990038
	1.23406	1.59001	0.495248	0.422624	0.682504	1.26888	1.63107	0.964844	0.576776	0.842288	1.6444	1.50915	2.13092	1.87394	1.14669
	3.05936	1.31221	0.357135	0.719126	0.762594	1.88207	2.31663	1.17978	0.901132	0.773673	2.07702	1.31135	1.0557	1.11509	1.67293
	1.01091	0.736731	0.327595	0.452412	0.720797	0.775898	1.86569	1.9821	0.787856	0.746234	1.2401		1.15306	1.07187	1.57225
	3.33275	1.41396	0.268444	0.437366	0.489404	1.3626	1.56295	0.903451	0.758965	0.782114	1.60198		1.11072		1.84842
	1.16059	1.10505	0.460361	0.533485	0.413309	1.07155	0.887671	0.969005	0.914695	0.926112			1.2392		1.7153
	1.56667	0.71316	0.32284	0.502269	0.293039	2.79804	1.05966	1.67223	0.766085	0.628288					0.743667
	1.00971	1.41079	0.401711	0.374509	0.553293	1.62394	0.964397	1.05595	0.540979	0.875724					1.59279
	1.26295	1.42712	0.412175	0.632956	0.663254	1.94038	0.940926	1.11021	0.86028	0.620306					1.8715
	1.17121	0.747857	0.539584	0.421129	0.695012	0.90105	0.784916	0.838013	0.935983	0.565456
	1.33609	1.42424	0.407391	0.779338	0.432948	1.48315	1.24701	1.59543	0.762654	0.724311
	1.44329	0.981865	0.524815	0.650071	0.543659	1.84908	2.43873	1.02057	0.70587	0.616351
	1.27925	1.07763	0.272298	0.423092	0.573259	1.7332	1.1939	1.03037	0.785618	0.590204
	2.10032	1.15912	0.346596	0.399838	0.472353	2.11922	1.1124	1.32032	1.00829	0.660865
	1.26295	0.837649	0.559596	0.4939	0.582551	1.47974	2.25409	0.67117	1.05027	0.589883
	3.10422	1.49839	0.489058	0.511954	0.779282	1.70066	2.17434	1.38038	0.725836	0.560679
	1.09626	0.915211	0.373847	0.547499	0.770945	1.28794	0.812061	1.00814	0.544873	0.504196
	1.36978	1.16239	0.729111	0.48456	0.654762	1.35672	0.794319	1.77167	0.937793	0.522328
	1.55334	1.19142	0.358217	0.542746	0.783168	1.46289	1.38093	1.53392	0.940172	1.01267
	2.25799	1.42894	0.461447	0.275109	0.789217	1.45358	1.00249	1.17734	0.740351	0.75552
	1.14667	0.82451	0.418164	0.477069	0.570754	1.40321	0.98321	1.7138	0.62715	0.690766
	1.1854	1.06713	0.287108	0.545098	0.525836	1.2916	1.22408	0.76369	0.808078	1.01871
	1.26295	0.890203	0.727165	0.631097	0.353433	1.74126	2.15086	0.814696	0.583511	1.0771
	1.08823	0.70836	0.733778	0.4515	0.365787	1.97817	1.96477	1.99162	1.16534	0.940784
	2.0039	0.785377	0.873873	0.484733	0.669282	1.57025	1.70739	1.01938	1.12266	1.02677
	2.0352	0.712435	0.69846	0.656471	0.578266	1.0662	1.39357	1.68734	0.776025	0.735746
	2.17878	0.731174	0.239245	0.704572	0.655568	1.51135	1.19898	1.54755	1.17485	0.962425
	1.00152	1.21046	0.758885	0.606098	0.455036	0.992026	2.62837	1.1306	0.85219	0.950959
	2.03163	0.738252	0.456968		0.481276		2.20168	1.0302	1.28829	0.688943
	1.63479	0.722413	0.3316		0.566141		2.11353	0.863696	1.16957	0.803332
	1.08571	1.24119	0.774439		0.677738		1.31419	1.07268	1.20909	0.579305
	2.10032	1.09827	0.939345		0.418682		2.36307	0.903451	1.29118	1.0492
	1.59855	1.5449	0.60921		0.680533		2.10096		0.96652	0.87113
	2.21568	1.88749	0.212809		0.775294		1.35367			1.10561
	2.35031	1.59302	0.689427		0.631919		1.36731
	1.82613	1.27863	0.756187		0.626361		1.77807
	1.45864	1.70806	0.493771		0.409146		1.59335
		0.805999	0.596542		0.616199		1.06964
		1.3			0.441717
		1.12841			0.491986
		1.45027			0.646796
		1.06042			0.465771
					0.688182
